# Supplementary material
Source: Springer Nature journal article supplement (https://www.springermedizin.de/resource/supplementary/13058_2009_2559_MOESM3_ESM.pdf/9701698)

**(A)**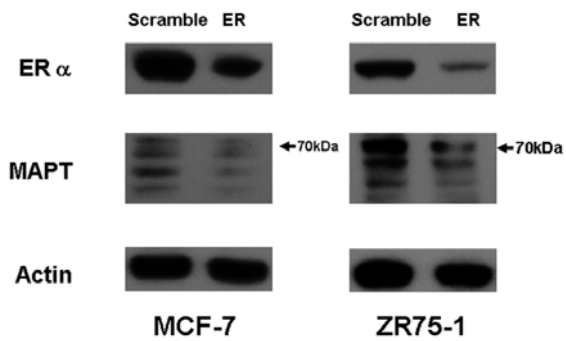**(B)**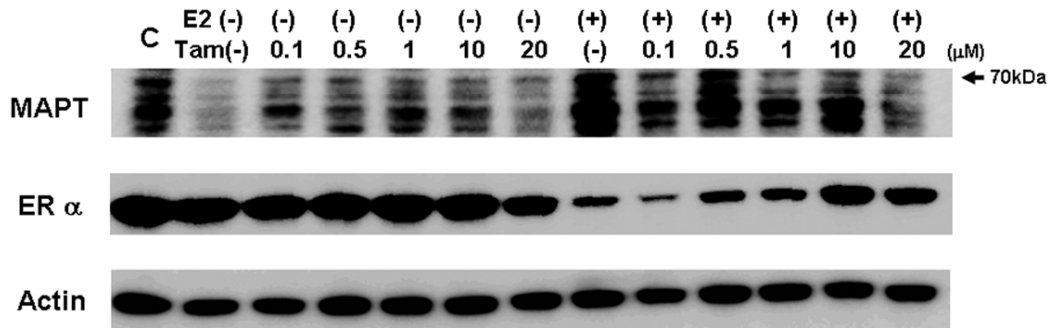**MCF-7**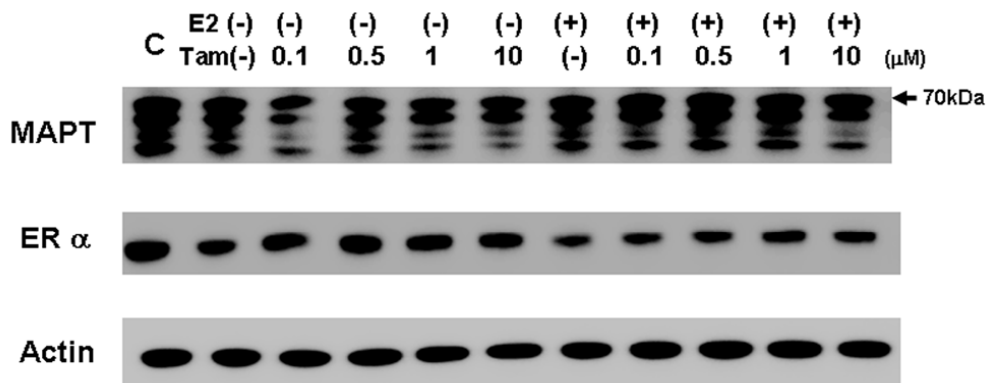**ZR75-1****(C)**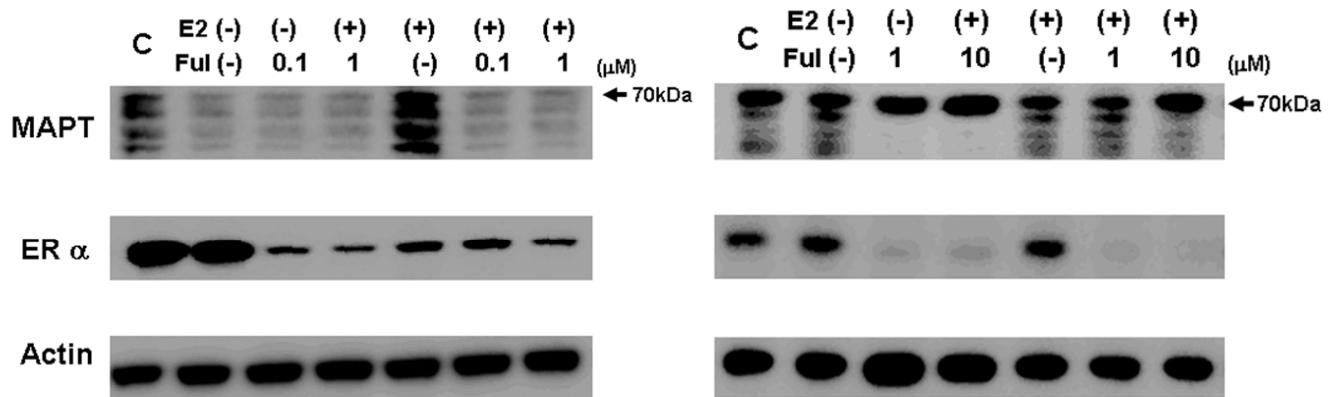**MCF-7****ZR75-1**

Supplement: MOESM3 [file 9701698]
